# Supplementary material for: Stabilization of D5hand C2vvalence tautomers of the croconate dianion
Source: Royal Society of Chemistry journal article supplement (doi:10.1039/b312545a), 2004-01-01
Supplement: b312545a.pdf [file b312545a.pdf]

## Electronic Supplementary Information (ESI)

for

### Stabilization of $D_{5h}$ and $C_{2v}$ valence tautomers of the croconate Dianion

Chi-Keung Lam,<sup>a</sup> Mei-Fun Cheng,<sup>a</sup> Chi-Lun Li,<sup>a</sup> Jie-Peng Zhang,<sup>b</sup> Xiao-Ming Chen,<sup>b</sup> Wai-Kee Li<sup>a</sup> and Thomas C. W. Mak<sup>\*a</sup>

<sup>a</sup> Department of Chemistry, The Chinese University of Hong Kong, Shatin, New Territories, Hong Kong SAR, P. R. China. E-mail: tcwmak@cuhk.edu.hk

<sup>b</sup> School of Chemistry and Chemical Engineering, Sun Yat-Sen University, Guangzhou 510275, China

---

Synthesis of **1**: 96 mg (0.461 mmol) of tetrahydroxy-1,4-quinone<sup>12</sup> was neutralized with two molar equivalents of aqueous tetra-*n*-propylammonium hydroxide (Aldrich, 1.0 M solution in water diluted to 0.35 M solution). Next, five molar equivalents of urea were added and the solution was stirred for about 5 minutes and then filtered. The yellow filtrate was subjected to slow evaporation at room temperature in a desiccator charged with anhydrous silica gel. Deposition of yellow rectangular prisms occurred in nearly quantitative yield over a period of several weeks. M.p. 88-91°C (dec.). IR(KBr): 3385, 3184, 2987, 2942, 1677, 1630, 1541, 1431, 1409, 1177, 992, 824, 782, 700, 596, 532 cm<sup>-1</sup>.

Synthesis of **2**: The above procedure was repeated with 82 mg of tetrahydroxy-1,4-quinone, two molar equivalents of aqueous tetra-*n*-butylammonium hydroxide (40 wt. % solution in water diluted to 0.2175M), and four molar equivalents of 1,3-dimethylurea to give a bright orange-red filtrate. This was stored in a desiccator charged with anhydrous calcium chloride, yielding a nearly quantitative crop of large yellow block-like crystals after about one month. M.p. 150-152°C (dec.), IR(KBr): 3375, 2962, 2875, 1662, 1537, 1412, 1383, 1312, 1272, 1173, 884, 630 cm<sup>-1</sup>.

#### Reference

**13.** *Org. Synth. Collect. vol. 5*, 1011-1013.

Supplementary Figures referred to in the Manuscript

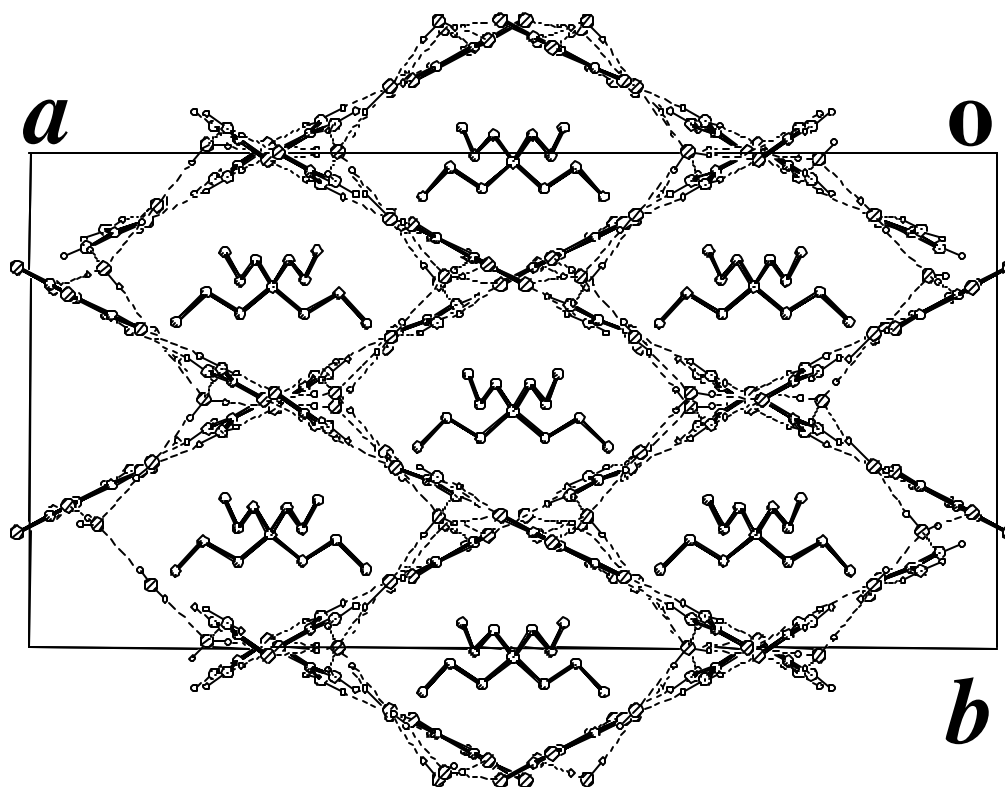

**Fig. 4** Rhombic channel system with cross-section  $12.8 \text{ \AA} \times 9.6 \text{ \AA}$  running parallel to the *c*-axis. Well-ordered tetra-*n*-propylammonium cations are accommodated in a single column along each channel. Broken lines represent hydrogen bonds and atom types are distinguished by different size and shading.

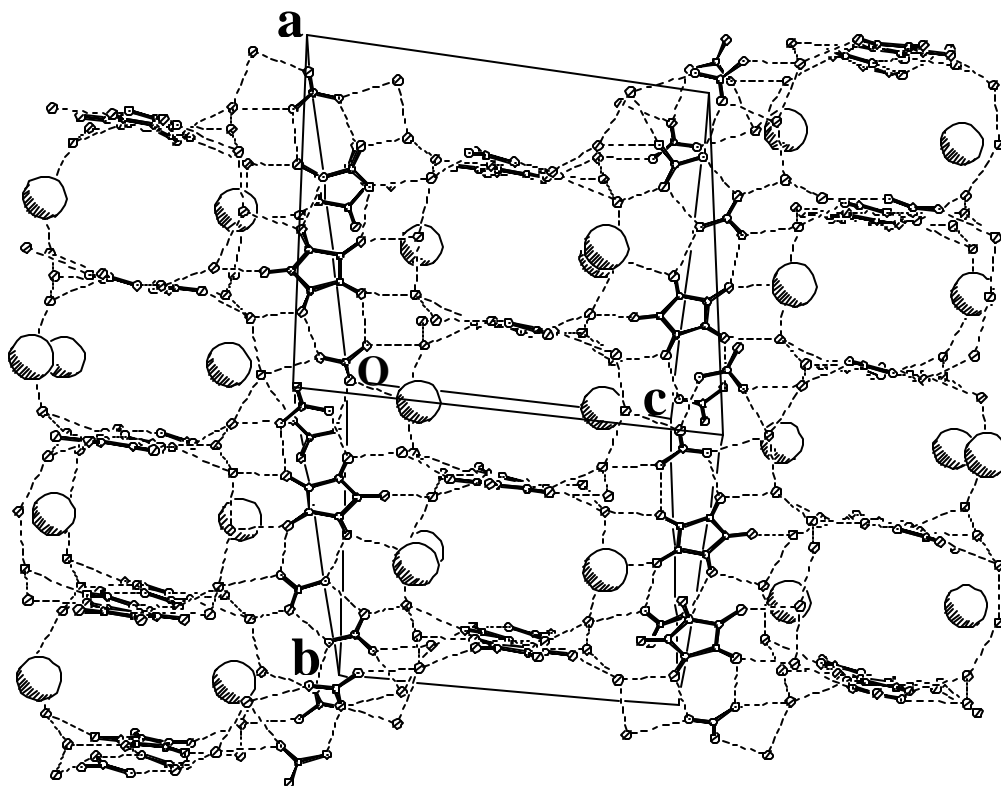

**Figure 5.** Perspective view of a portion of the crystal structure of  $[(n\text{-C}_3\text{H}_7)_4\text{N}^+]_2\text{C}_5\text{O}_5^{2-} \cdot 3(\text{NH}_2)_2\text{CO} \cdot 8\text{H}_2\text{O}$  (**1**) showing a channel system running parallel to the  $[110]$  direction. Two columns of well-ordered tetra-*n*-propylammonium cations (represented by large spheres for clarity) can be accommodated within each channel with the same dimensions as  $[1\bar{1}0]$  channel system. Broken lines represent hydrogen bonds and atom types are distinguished by different sizes and shadings.

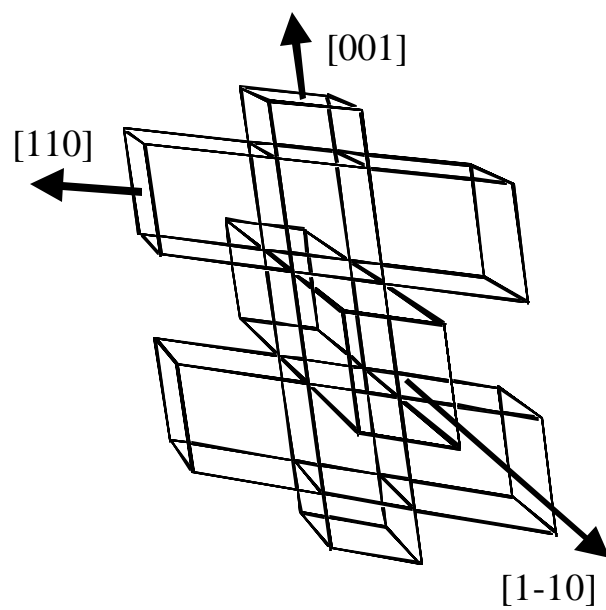

**Figure 6.** Schematic diagram showing the arrangement and orientation of three intersecting channel systems in  $[(n\text{-C}_3\text{H}_7)_4\text{N}^+]_2\text{C}_5\text{O}_5^{2-} \cdot 3(\text{NH}_2)_2\text{CO} \cdot 8\text{H}_2\text{O}$  (**1**).

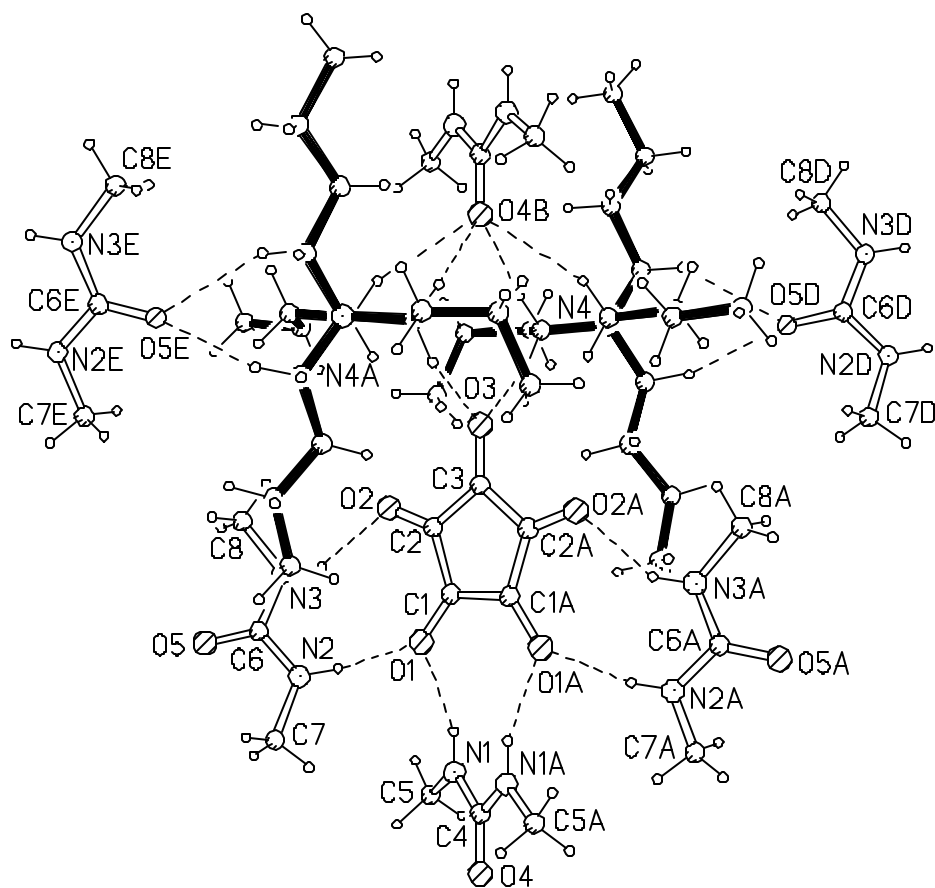

**Fig. 7** A portion of the hydrogen-bonded layer showing extensive C—H···O hydrogen-bonding between the  $C_5O_5^{2-} \cdot 3(CH_3NH)_2CO$  aggregate and its neighboring tetra-*n*-butylammonium ions. Symmetry transformations: A(1-*x*, *y*, 1/2 -*z*), B(*x*, *y*-1, *z*), C(1-*x*, *y*-1, 1/2 -*z*), D(*x*-1/2, *y*-1/2, *z*) and E(3/2-*x*, *y*-1/2, 1/2-*z*).

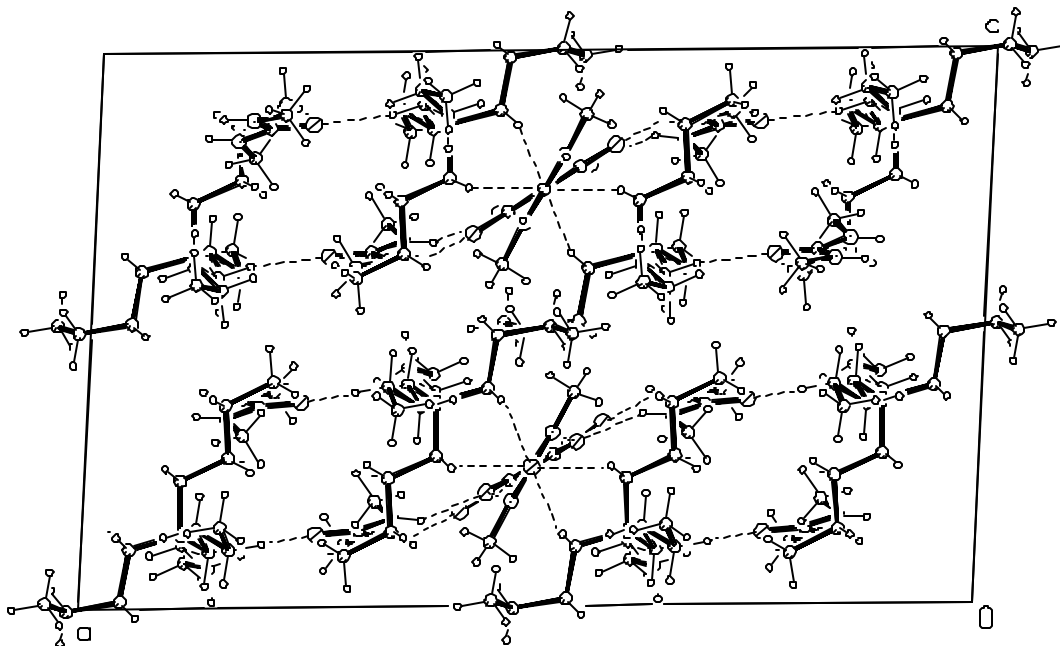

**Figure 8.** Crystal structure of  $[(n\text{-C}_4\text{H}_9)_4\text{N}^+]_2\text{C}_5\text{O}_5^{2-} \cdot 3(\text{CH}_3\text{NH})_2\text{CO}$  (**2**) viewed along the  $b$ -axis showing the well-ordered tetra- $n$ -butylammonium cations sandwiched between anionic host layers. The crystal packing is significantly consolidated by an extensive system of weak  $\text{C}(sp^3)\text{—H}\cdots\text{O}$  donor hydrogen bonds from the organic cations to the croconate and 1,3-dimethylurea molecules.

## Supplementary Tables referred to in the Manuscript

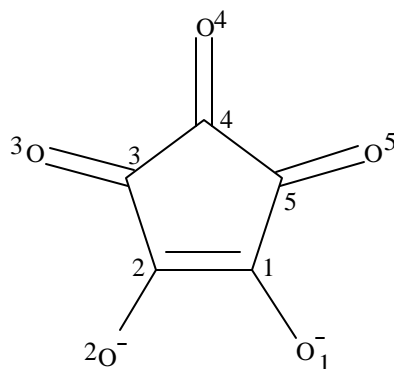

**Table 1. Optimized C—C and C—O Bond Lengths\* of the Charge-Localized Form of an isolated  $C_5O_5^{2-}$  ( $C_{2v}$ ).**

| Level of Theory          | C3–C4<br>(Å) | C2–C3<br>(Å) | C1–C2<br>(Å) | C4–O4<br>(Å) | C3–O3<br>(Å) | C2–O2<br>(Å) | Imaginary<br>frequency |
|--------------------------|--------------|--------------|--------------|--------------|--------------|--------------|------------------------|
| HF/STO-3G                | 1.494826     | 1.494909     | 1.494800     | 1.264735     | 1.264750     | 1.264682     | 0                      |
| HF/3-21G(d)              | 1.462797     | 1.462855     | 1.462812     | 1.248500     | 1.248456     | 1.248426     | 0                      |
| HF/3-21+G(d)             | 1.466508     | 1.466570     | 1.466516     | 1.252758     | 1.252743     | 1.252684     | 0                      |
| HF/6-31G(d)              | 1.472719     | 1.472713     | 1.472723     | 1.227288     | 1.227294     | 1.227292     | 0                      |
| HF/6-31+G(d)             | 1.476345     | 1.476340     | 1.476362     | 1.225849     | 1.225848     | 1.225848     | 2                      |
| HF/6-311+G(d)            | 1.475215     | 1.475212     | 1.475225     | 1.220894     | 1.220894     | 1.220894     | 0                      |
| B3 LYP /3-21G(d)         | 1.484892     | 1.484843     | 1.484845     | 1.273472     | 1.273252     | 1.273390     | 0                      |
| B3 LYP /3-21+G(d)        | 1.483551     | 1.483441     | 1.483486     | 1.278979     | 1.279090     | 1.279084     | 0                      |
| B3 LYP /6-31G(d)         | 1.490359     | 1.490331     | 1.490227     | 1.253708     | 1.253613     | 1.253712     | 0                      |
| B3 LYP /6-31+G(d)        | 1.490305     | 1.490215     | 1.490157     | 1.253115     | 1.253111     | 1.253178     | 0                      |
| B3 LYP /6-311+G(d)       | 1.488465     | 1.488487     | 1.488403     | 1.246756     | 1.246746     | 1.246744     | 0                      |
| MP2/6-31+G(d)            | 1.487339     | 1.487238     | 1.487244     | 1.264625     | 1.264550     | 1.264653     | 2                      |
| MP2(FULL)/6-31G(d)       | 1.484741     | 1.484767     | 1.484756     | 1.261331     | 1.261287     | 1.261307     | 0                      |
| MP2(FULL)/6-311+G(d)     | 1.487149     | 1.487072     | 1.487055     | 1.253567     | 1.253512     | 1.253602     | **                     |
| MP2(FULL)/ 6-31+G(2df,p) | 1.478737     | 1.478693     | 1.478643     | 1.249415     | 1.249310     | 1.249415     | **                     |
| B3PW91/6-31+G(2df,p)     | 1.485612     | 1.485565     | 1.485360     | 1.244547     | 1.244520     | 1.244606     | 0                      |

\* The calculated bond lengths (in Å) shown here have six significant figures, instead of the usual three, after the decimal point. This is because, if we only report three significant figures after the decimal points, the optimized  $C_{2v}$  geometry cannot be distinguished from the  $D_{5h}$  geometry.

\*\* Vibrational frequency calculation is used to determine the nature of a stationary point found by a geometry optimization. For structures optimized by very high level calculations such as those marked by \*\*, vibrational frequency analysis has not been conducted due to the limitation of computational power.

**Table 2. Optimized\* C—C and C—O Bond Lengths of the Charge-Delocalized Form of an isolated  $C_5O_5^{2-}$  ( $D_{5h}$ ).**

| Level of Theory          | C—C (Å)            | C—O (Å)            | Imaginary frequency |
|--------------------------|--------------------|--------------------|---------------------|
| HF/STO-3G                | 1.494              | 1.264              | 0                   |
| HF/3-21G(d)              | <b>1.462</b>       | <b>1.248</b>       | 0                   |
| HF/3-21+G(d)             | 1.466              | <b>1.252</b>       | 0                   |
| HF/6-31G(d)              | 1.472              | 1.227              | 0                   |
| HF/6-31+G(d)             | 1.476              | 1.225              | 2                   |
| HF/6-311+G(d)            | 1.475              | 1.220              | 0                   |
| B3 LYP /3-21G(d)         | 1.484              | 1.273              | 0                   |
| B3 LYP /6-31G(d)         | 1.490              | <b>1.253</b>       | 0                   |
| B3 LYP /6-31+G(d)        | 1.490              | <b>1.253</b>       | **                  |
| B3 LYP /6-311+G(d)       | 1.488              | <b>1.246</b>       | **                  |
| B3LYP/6-31+G(2df,p)      | 1.488              | <b>1.247</b>       | **                  |
| MP2(FULL)/3-21G(d)       | 1.496              | 1.291              | 0                   |
| MP2(FULL)/6-31G(d)       | 1.484              | 1.261              | 0                   |
| MP2(FULL)/6-31+G(d)      | 1.485              | 1.263              | 2                   |
| QCISD/6-31+G(d)          | 1.486              | 1.257              | **                  |
| B3PW91/aug-cc-pvtz       | 1.482              | <b>1.243</b>       | **                  |
|                          |                    |                    |                     |
| CASSCF(2,4)/3-21G(d)     | <b>1.464</b>       | <b>1.250</b>       | 0                   |
| CASSCF(2,4)/6-31+G(d)    | 1.477              | 1.227              | **                  |
| CASSCF(6,4)/ 3-21G(d)    | <b>1.460</b>       | <b>1.252</b>       | 0                   |
| CASSCF(6,6)/ 3-21G(d)    | <b>1.458</b>       | 1.260              | 1                   |
| CASSCF(6,8)/ 3-21G(d)    | <b>1.464</b>       | <b>1.250</b>       | 0                   |
| CASSCF(10,8)/3-21G(d)    | <b>1.458</b>       | 1.261              | 0                   |
| CASSCF(10,8)/3-21+G(d)   | <b>1.461</b>       | 1.263              | 0                   |
| CASSCF(10,8)/6-31G(d)    | 1.469              | 1.235              | 0                   |
| CASSCF(10,8)/6-31+G(d)   | 1.473              | 1.233              | **                  |
| CASSCF(10,8)/6-311+G(d)  | 1.471              | 1.229              | **                  |
| CASSCF(10,8)/aug-cc-pvtz | 1.473              | 1.220              | **                  |
| CASSCF(12,8)/3-21G(d)    | <b>1.456</b>       | 1.257              | 0                   |
| CASSCF(12,8)/3-21+G(d)   | <b>1.459</b>       | 1.259              | 0                   |
| CASSCF(12,8)/6-31G(d)    | 1.469              | 1.232              | 0                   |
| CASSCF(12,8)/6-31+G(d)   | 1.471              | 1.231              | **                  |
| CASSCF(12,8)/6-311+G(d)  | 1.474              | 1.224              | **                  |
| Experiment               | <b>1.451-1.465</b> | <b>1.241-1.254</b> |                     |

\* The C—C and C—O bond lengths of croconate dianion optimized at certain theoretical levels are very close to the experimental values. These levels are marked in blue. It appears that the HF/3-21G(d), CASSCF(2,4)/3-21G(d) and CASSCF(6,8)/ 3-21G(d) yields the best results for  $C_5O_5^{2-}$  as a whole.

\*\* For structures optimized by very high level calculations such as those marked by \*\*, vibrational frequency analysis has not been conducted due to the limitation of computational power.



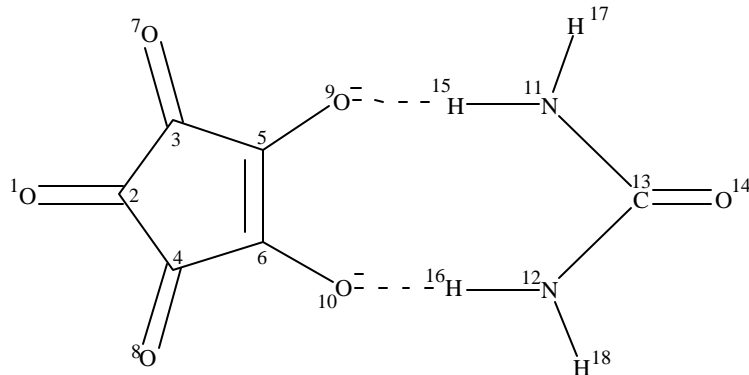

**Table 3. Optimized C—C and C—O Bond Lengths of the Charge-Localized Form of a hydrogen-bonded  $C_5O_5^{2-}$  ( $C_{2v}$ ).**

| Level of Theory      | C2–C3<br>(Å) | C3–C5<br>(Å) | C5–C6<br>(Å) | O1–C2<br>(Å) | C3–O7<br>(Å) | C5–O9<br>(Å) | O9–H15<br>(Å) | N11–H15<br>(Å) | N11–H17<br>(Å) | N11–C13<br>(Å) | C13–O14<br>(Å) | Imag<br>Frec |
|----------------------|--------------|--------------|--------------|--------------|--------------|--------------|---------------|----------------|----------------|----------------|----------------|--------------|
| HF/STO-3G            | 1.530        | 1.530        | 1.417        | 1.233        | 1.240        | 1.316        | 1.287         | 1.141          | 1.022          | 1.394          | 1.254          | 4            |
| HF/3-21G(d)          | 1.477        | 1.457        | 1.433        | 1.232        | 1.238        | 1.267        | 1.721         | 1.026          | 0.994          | 1.351          | 1.246          | 0            |
| HF/3-21+G(d)         | 1.482        | 1.458        | 1.440        | 1.237        | 1.244        | 1.268        | 1.767         | 1.021          | 0.995          | 1.350          | 1.269          | 0            |
| HF/6-31G(d)          | 1.484        | 1.466        | 1.451        | 1.215        | 1.219        | 1.241        | 1.853         | 1.013          | 0.991          | 1.348          | 1.226          | 2            |
| HF/6-31+G(d)         | 1.487        | 1.469        | 1.454        | 1.214        | 1.219        | 1.239        | 1.877         | 1.012          | 0.992          | 1.347          | 1.230          | 4            |
| HF/6-311+G(d)        | 1.486        | 1.468        | 1.454        | 1.209        | 1.214        | 1.234        | 1.888         | 1.007          | 0.989          | 1.347          | 1.224          | 3            |
| B3 LYP /3-21G(d)     | 1.492        | 1.478        | 1.459        | 1.262        | 1.264        | 1.286        | 1.671         | 1.053          | 1.012          | 1.372          | 1.265          | 0            |
| B3 LYP /3-21+G(d)    | 1.493        | 1.475        | 1.463        | 1.268        | 1.271        | 1.289        | 1.705         | 1.047          | 1.012          | 1.369          | 1.290          | 0            |
| B3 LYP /6-31G(d)     | 1.496        | 1.484        | 1.470        | 1.244        | 1.246        | 1.264        | 1.768         | 1.039          | 1.006          | 1.366          | 1.248          | 2            |
| B3 LYP /6-31+G(d)    | 1.498        | 1.483        | 1.471        | 1.244        | 1.247        | 1.262        | 1.788         | 1.037          | 1.007          | 1.363          | 1.255          | 2            |
| B3 LYP /6-311+G(d)   | 1.496        | 1.481        | 1.469        | 1.238        | 1.240        | 1.256        | 1.797         | 1.032          | 1.004          | 1.362          | 1.248          | 2            |
| MP2(FULL)/3-21G(d)   | 1.496        | 1.490        | 1.482        | 1.287        | 1.285        | 1.296        | 1.723         | 1.042          | 1.010          | 1.379          | 1.272          | 1            |
| MP2(FULL)/6-31G(d)   | 1.487        | 1.479        | 1.472        | 1.256        | 1.256        | 1.268        | 1.790         | 1.035          | 1.006          | 1.362          | 1.251          | 2            |
| MP2(FULL)/6-311+G(d) | 1.492        | 1.481        | 1.474        | 1.247        | 1.249        | 1.260        | 1.811         | 1.027          | 1.003          | 1.361          | 1.248          | *            |

\* For structures optimized by very high level calculations such as those marked by \*, vibrational frequency analysis has not been conducted due to the limitation of computational power.

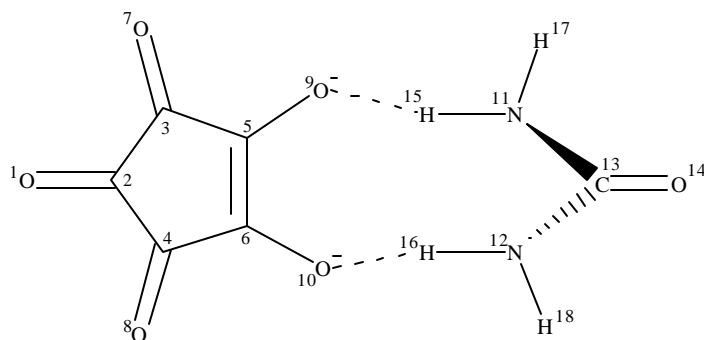

**Table 4. Optimized C—C and C—O Bond lengths of the charge-localized form of  $C_5O_5^{2-}$  ( $C_2$ ).**

| Level of Theory      | C2—C3<br>(Å) | C3—C5<br>(Å) | C5—C6<br>(Å) | O1—C2<br>(Å) | C3—O7<br>(Å) | C5—O9<br>(Å) | O9—H15<br>(Å) | N11—H15<br>(Å) | N11—H17<br>(Å) | N11—C13<br>(Å) | C13—O14<br>(Å) | Ir<br>F |
|----------------------|--------------|--------------|--------------|--------------|--------------|--------------|---------------|----------------|----------------|----------------|----------------|---------|
| HF/STO-3G            | 1.532        | 1.495        | 1.417        | 1.233        | 1.241        | 1.317        | 1.293         | 1.149          | 1.031          | 1.418          | 1.246          |         |
| HF/3-21G(d)          | 1.477        | 1.457        | 1.433        | 1.232        | 1.238        | 1.267        | 1.720         | 1.026          | 0.994          | 1.351          | 1.246          |         |
| HF/6-31G(d)          | 1.484        | 1.466        | 1.450        | 1.215        | 1.219        | 1.241        | 1.859         | 1.014          | 0.993          | 1.353          | 1.223          |         |
| B3 LYP /3-21G(d)     | 1.492        | 1.478        | 1.459        | 1.262        | 1.264        | 1.286        | 1.670         | 1.053          | 1.012          | 1.372          | 1.265          |         |
| B3 LYP /6-31G(d)     | 1.497        | 1.484        | 1.470        | 1.244        | 1.246        | 1.264        | 1.774         | 1.041          | 1.010          | 1.373          | 1.245          |         |
| B3 LYP /6-311+G(d)   | 1.496        | 1.481        | 1.469        | 1.238        | 1.240        | 1.257        | 1.800         | 1.033          | 1.005          | 1.365          | 1.247          |         |
| MP2(FULL)/3-21G(d)   | 1.496        | 1.490        | 1.482        | 1.287        | 1.286        | 1.295        | 1.722         | 1.042          | 1.010          | 1.379          | 1.272          |         |
| MP2(FULL)/6-311+G(d) | 1.492        | 1.480        | 1.473        | 1.247        | 1.249        | 1.260        | 1.811         | 1.030          | 1.006          | 1.368          | 1.245          |         |

\* For structures optimized by very high level calculations such as those marked by \*, vibrational frequency analysis has not been conducted due to the limitation of computational power.

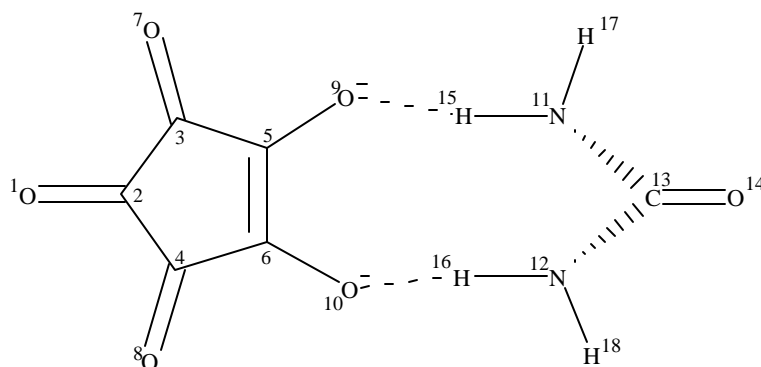

**Table 5. Optimized C—C and C—O Bond lengths of the charge-localized form of  $C_5O_5^{2-}$  ( $C_s$ ).**

| Level of Theory      | C2—C3<br>(Å) | C3—C5<br>(Å) | C5—C6<br>(Å) | O1—C2<br>(Å) | C3—O7<br>(Å) | C5—O9<br>(Å) | O9—H15<br>(Å) | N11—H15<br>(Å) | N11—H17<br>(Å) | N11—C13<br>(Å) | C13—O14<br>(Å) | Ir<br>F |
|----------------------|--------------|--------------|--------------|--------------|--------------|--------------|---------------|----------------|----------------|----------------|----------------|---------|
| HF/STO-3G            | 1.535        | 1.496        | 1.412        | 1.232        | 1.240        | 1.320        | 1.297         | 1.152          | 1.034          | 1.424          | 1.246          |         |
| HF/3-21G(d)          | 1.477        | 1.457        | 1.433        | 1.232        | 1.238        | 1.267        | 1.720         | 1.026          | 0.994          | 1.351          | 1.246          |         |
| HF/6-31G(d)          | 1.484        | 1.466        | 1.450        | 1.215        | 1.219        | 1.241        | 1.862         | 1.014          | 0.994          | 1.356          | 1.222          |         |
| B3 LYP /3-21G(d)     | 1.492        | 1.478        | 1.459        | 1.262        | 1.264        | 1.286        | 1.669         | 1.053          | 1.011          | 1.372          | 1.265          |         |
| B3 LYP /6-31G(d)     | 1.497        | 1.484        | 1.470        | 1.244        | 1.246        | 1.264        | 1.776         | 1.042          | 1.011          | 1.376          | 1.245          |         |
| B3 LYP /6-311+G(d)   | 1.496        | 1.481        | 1.469        | 1.237        | 1.240        | 1.257        | 1.803         | 1.033          | 1.007          | 1.369          | 1.245          |         |
| MP2(FULL)/3-21G(d)   | 1.496        | 1.490        | 1.482        | 1.287        | 1.286        | 1.295        | 1.722         | 1.042          | 1.010          | 1.379          | 1.272          |         |
| MP2(FULL)/6-311+G(d) | 1.492        | 1.480        | 1.473        | 1.247        | 1.248        | 1.260        | 1.815         | 1.030          | 1.007          | 1.371          | 1.244          |         |

\* For structures optimized by very high level calculations such as those marked by \*, vibrational frequency analysis has not been conducted due to the limitation of computational power.
